# Supplementary material
Source: PubMed Central journal article supplement (PMC1360985)

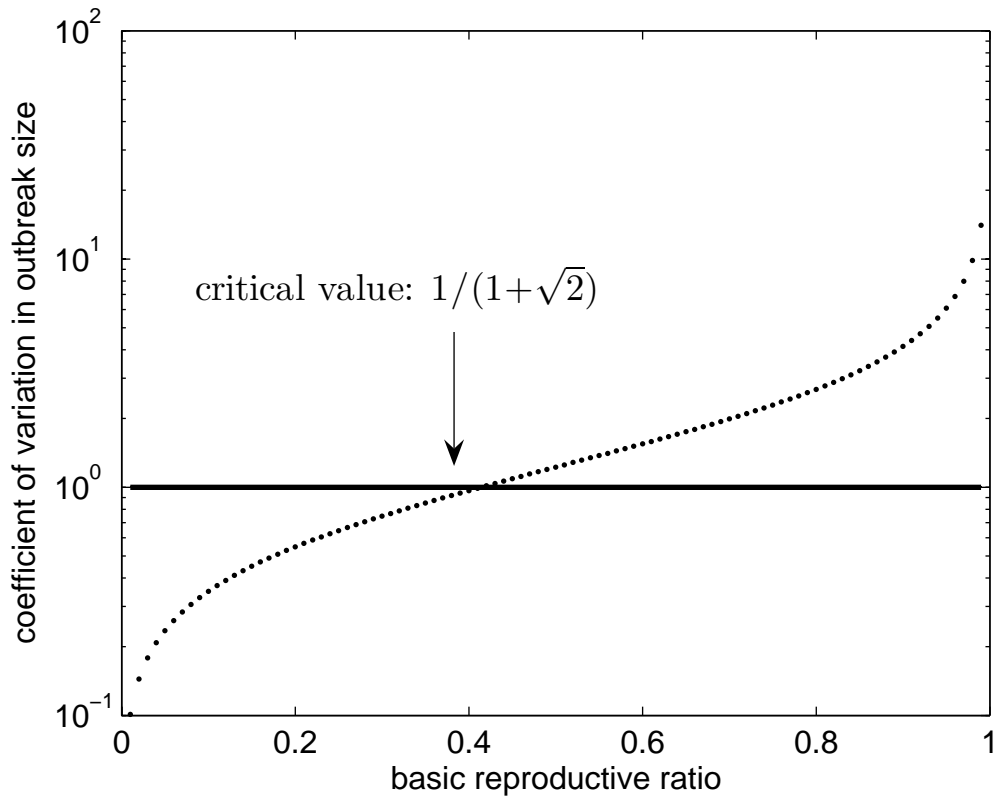

Supplement: pmed.0030003.sg001.pdf [file pmed.0030003.sg001.pdf]
